# Supplementary material for: Evaluating the mutagenic potential of aerosol organic compounds using informatics-based screening
Source: Copernicus journal article supplement (doi:10.5194/acp-18-2329-2018), 2018-02-16
Supplement: Supplementary file 1 [file acp-18-2329-2018-supplement.zip]

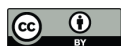

## *Supplement of*

# **Evaluating the mutagenic potential of aerosol organic compounds using informatics-based screening**

**Stefano Decesari et al.**

*Correspondence to:* Stefano Decesari (s.decesari@isac.cnr.it)

- acp-18-2329-2018-supplement-title-page.pdf
- Tables
  - TableS1.xlsx
  - TableS5.xlsx
  - TableS6.xlsx
  - TableS7.xlsx
  - TableS8b.xlsx
- supplementary information.docx

The copyright of individual parts of the supplement might differ from the CC BY 4.0 License.
